# Supplementary material for: Quantification of Circulating Cell Free Mitochondrial DNA in Extracellular Vesicles with PicoGreen™ in Liquid Biopsies: Fast Assessment of Disease/Trauma Severity
Source: PubMed Central journal article supplement (PMC8067453; doi:10.3390/cells10040819), 2021-04-06
Supplement: cells-10-00819-s001.pdf [file cells-10-00819-s001.pdf]

**Supplementary Figures.**

**Quantification of Circulating Cell Free Mitochondrial DNA in Extracellular Vesicles with PicoGreen in Liquid Biopsies: Fast Assessment of Disease/Trauma Severity.**

Michela Marcatti<sup>1</sup>, Jamal Saada<sup>2</sup>, Ikenna Okereke<sup>3</sup>, Charles E. Wade<sup>4</sup>, Stefan H. Bossmann<sup>5</sup>, Massoud Motamedi<sup>6</sup>, and Bartosz Szczesny<sup>2,6,\*</sup>

Departments of <sup>1</sup>Neurology, <sup>2</sup>Anesthesiology, <sup>3</sup>Surgery, and <sup>6</sup>Ophthalmology and Visual Sciences, University of Texas Medical Branch, Galveston, TX, USA; <sup>4</sup>Department of Surgery, University of Texas Health Science Center in Houston, Houston, TX, USA; <sup>5</sup>Department of Cancer Biology, The University of Kansas Medical Center, Kansas City, KS, USA

\*Corresponding author: baszczes@utmb.edu (B.S.)

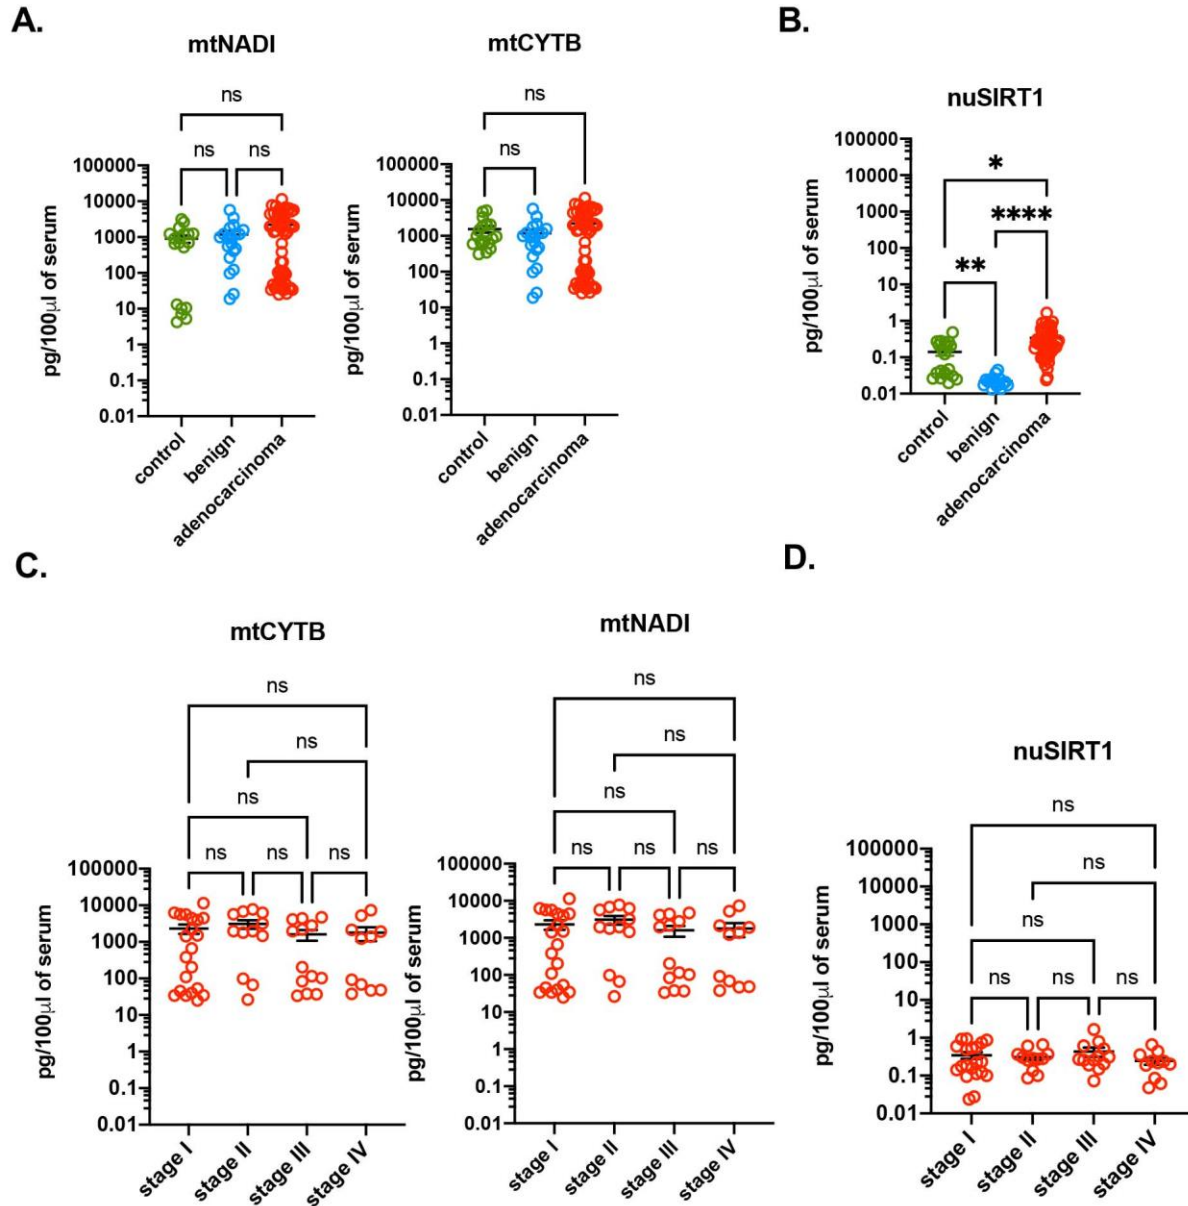

Figure S1. Serum of lung adenocarcinoma subjects have a high amount of ccf-DNA. The amount of mtDNA (A) and nuDNA (B) were quantified with qPCR using mtNADI and mtCYTB, and nuSIRT1 primers, respectively, in serum of healthy volunteers (n=20), subjects with benign tumors (n=20) and with lung adenocarcinoma (n=57). The amount of mtDNA (C) and nuDNA (D) were quantified with qPCR using mtNADI and mtCYTB, and nuSIRT1 primers, respectively, in serum of subject with stage I (n=21), stage II (n=12), stage III (n=13) and stage IV (n=11) of lung adenocarcinoma. The serum was obtained from LCBRN. The amount of DNA is expressed as pg of DNA in 100 μl of serum. \* p<0.05, \*\* p<0.01, \*\*\*\* p<0.0001.

### linear regression analysis of TBI subjects

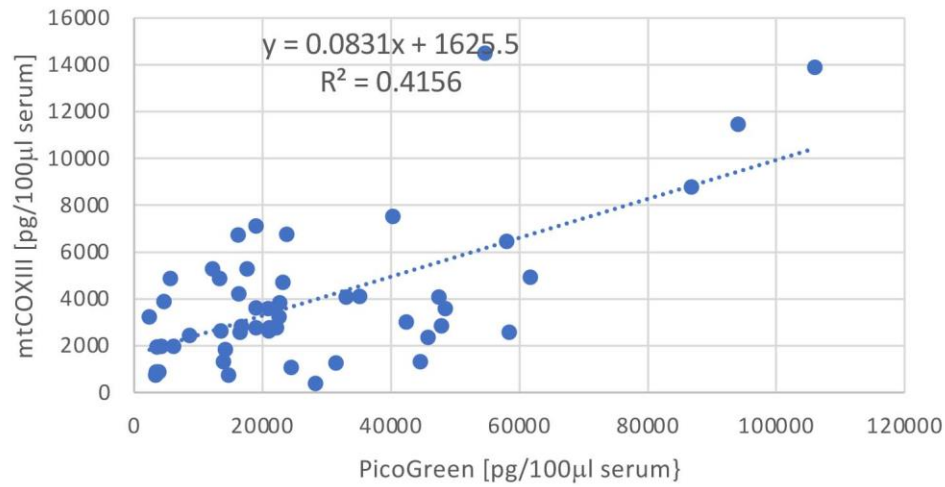

### linear regression analysis of TBI subjects

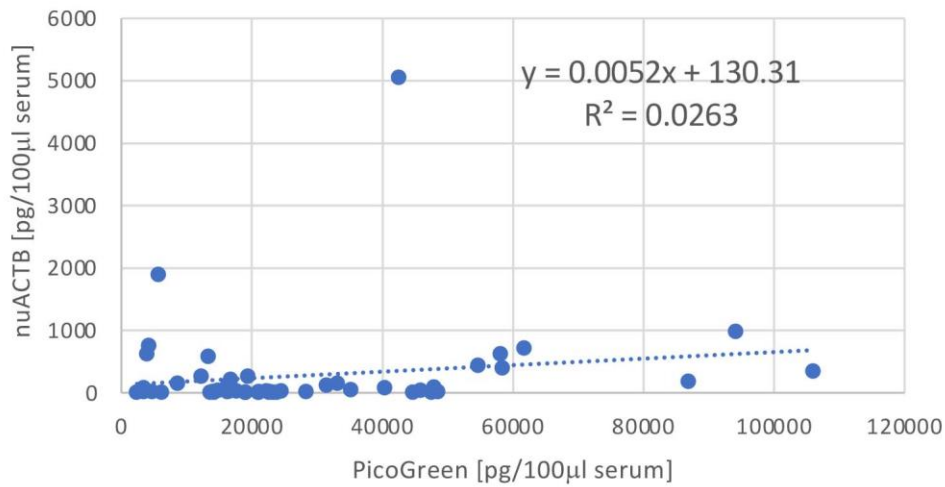

Figure S2. Linear regression analysis of the TBI cohort. We compared amount of ccf-DNA calculated using PicoGreen and with qPCR using mtDNA-specific (mtCOXIII) and nu-DNA-specific (nuACTB) primers.  $R^2$  value was calculated with Excel software.
